# Supplementary material
Source: Springer Nature journal article supplement (https://www.springermedizin.de/resource/supplementary/12884_2014_1145_MOESM1_ESM.pdf/9459020)
Supplement: MOESM1 [file 9459020]

## 1.

### **Social**

- Gendered divisions of labour and space, especially during pregnancy/birth/childrearing
- Maternal and child health spaces 'inaccessible' to men due to gender and/or generational dynamics
- Pressure to embrace dominant socio-cultural definition of masculinity
- No support for 'alternative masculinities' – men are ridiculed for stepping outside gender 'boundaries'

### **Economic**

- Men must work to support families financially, often required to travel away from home to work
- Employer and /or national policies do not allow men time from work during pregnancy, childbirth, postpartum periods

### **Institutional**

- Health and gender programs often only target women, men remain uneducated on relevant health behaviours
- Health facilities are not welcoming to/prohibit men
